# Supplementary material
Source: PubMed Central journal article supplement (PMC3856580)
Supplement: NIHMS520837-supplement-Supporting_Information.pdf [file NIHMS520837-supplement-Supporting_Information.pdf]

## Supplemental data

to manuscript “**Impaired Oral Tolerance Induction in Diabetes Prone but not in Diabetes Resistant Mice Revealed by Cholera Toxin Subunit B-Peptide Fusion Proteins**”

Maximiliano Presa, Angela Zarama Ortiz, Nahir Garabatos, Cristina Izquierdo, Elisa I. Rivas, Luc Teyton, Conchi Mora, David Serreze, and Thomas Stratmann

**Supplemental Table S1**, referring to Figure 2  
B: Absolute number of A<sup>97</sup>/2.5mi tetramer<sup>+</sup> CD4<sup>+</sup>  
T cells of NOD mice immunized i.p. as  
indicated<sup>a</sup>

| Treatment  | n | 2.5mi <sup>+</sup> Teff | 2.5mi <sup>+</sup> Treg |
|------------|---|-------------------------|-------------------------|
| CTB-2.5mi  | 6 | 10401 ± 1950 ***        | 498 ± 114**             |
| s.p. 2.5mi | 6 | 736 ± 154               | 21.9 ± 14               |
| Naive      | 6 | 98.9 ± 23               | 7.6 ± 2                 |

<sup>a</sup> Values indicate the mean of tetramer<sup>+</sup> cells ± SEM per 4x10<sup>5</sup> CD4<sup>+</sup> T cells. One way ANOVA and Bonferroni post-test: \*\*\**p* < 0.0001, \*\**p* < 0.001 compared with s.p. 2.5mi. Cell numbers were normalized to 4x10<sup>5</sup> CD4<sup>+</sup> T cells, the average number collected per mouse.

**Supplemental Table S2**, referring to Figure 3  
A: Absolute numbers of tetramer<sup>+</sup> CD4 T cells  
in NOD mice receiving the indicated type of  
treatment<sup>a</sup>

| Treatment  | n | CD4 <sup>+</sup> 2.5mi <sup>+</sup> T cells |
|------------|---|---------------------------------------------|
| CTRL-Naive | 6 | 126 ± 19                                    |
| ORAL       | 6 | 254 ± 33                                    |
| CTRL-IP    | 6 | 3578 ± 397                                  |
| ORAL-IP    | 6 | 2693 ± 292                                  |

<sup>a</sup> Values indicate the mean of tetramer<sup>+</sup> cells ± SEM per 4x10<sup>5</sup> CD4<sup>+</sup> T cells. Cell numbers were normalized to 4x10<sup>5</sup> CD4<sup>+</sup> T cells, the average number collected per mouse. CTRL-IP vs ORAL-IP were not statistically significant.

**Supplemental Table S3**, referring to Figure 7: Absolute numbers of tetramer<sup>+</sup> CD4 T cells of the indicated subsets receiving the indicated type of treatment <sup>a)</sup>

| Strain                                    | Treatment          | n | Naive Teff<br>2.5mi <sup>+</sup> | CM Teff<br>2.5mi <sup>+</sup> | EM Teff<br>2.5mi <sup>+</sup> |
|-------------------------------------------|--------------------|---|----------------------------------|-------------------------------|-------------------------------|
| <b>NOD.Foxp3<sup>EGFP</sup></b>           | CTRL-PBS           | 6 | 48 ± 4                           | 3 ± 1                         | 4 ± 1                         |
|                                           | ORAL-CTB-<br>2.5mi | 6 | 21 ± 3 (ns)                      | 19 ± 9 (ns)                   | 193 ± 81 **                   |
| <b>NODxB6.Foxp3<sup>EGFP</sup><br/>F1</b> | CTRL-PBS           | 6 | 49 ± 18                          | 15 ± 8                        | 21 ± 3                        |
|                                           | ORAL-CTB-<br>2.5mi | 6 | 68 ± 14 (ns)                     | 13 ± 6 (ns)                   | 36 ± 18 (ns)                  |

<sup>a)</sup> Three mice per treatment group were orally immunized with 200 µg of CTB-2.5mi or 200 µL of PBS, every 3-4 days with a total of 5 doses. Four days after the last oral dose Teff 2.5mi<sup>+</sup> cells were analyzed for CD44 and CD62L expression. Cell numbers were normalized to 4x10<sup>5</sup> CD4<sup>+</sup> T cells, the average number collected per mouse. Values are shown as mean ± SEM of 2 independent experiments. Teff 2.5mi<sup>+</sup>: CD4<sup>+</sup>Foxp3-EGFP<sup>neg</sup> 2.5mi<sup>+</sup>. Naive: CD62L<sup>hi</sup> CD44<sup>lo</sup>, CM (Central Memory): CD62L<sup>hi</sup> CD44<sup>hi</sup>, EM (Effector Memory): CD62L<sup>lo</sup> CD44<sup>hi</sup>. Two way ANOVA and Bonferroni post-test: ORAL-CTB-2.5mi vs CTRL-PBS: \*\**p* < 0.01, (ns) *p*>0.05.

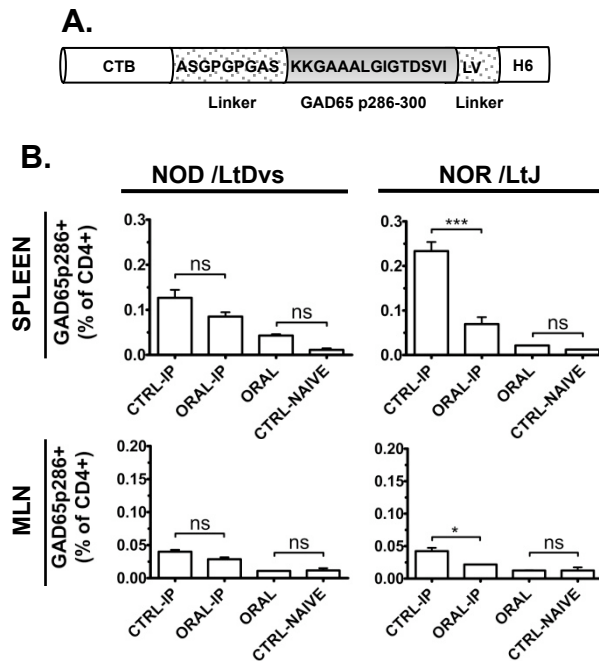

**Supplemental Figure S1** NOR but not NOD mice mount oral tolerance against GAD<sub>286-300</sub>.

(A) Schematic representation of the CTB-GAD<sub>286-300</sub> construct.

(B) Five-to-6-week-old NOD or NOR females were treated with 5 doses of 200 µg CTB-GAD<sub>286-300</sub> 3 to 4 days i.g. (ORAL) and analyzed 4 days after the last dose for GAD<sub>286-300</sub> specific T cell expansion in the spleen (A) and in mesenteric lymph nodes (B; MLN) as explained in the legend for Fig. 1 by tetramer staining and FACS analysis. Unmanipulated littermates served as baseline control (CTRL-Naive). Alternatively, 4 days after the last oral dose, mice received a boost immunization i.p. with 50 µg of CTB-GAD<sub>286-300</sub>, were rested for an additional 4 days, and next analyzed as above (ORAL-IP). As controls, littermates were immunized i.p. without receiving the protein i.g. (CTRL-IP). Mean values ± SEM of 3 animals per group and treatment are shown. Values represent percentages of GAD<sub>286-300</sub> tetramer positive CD4<sup>+</sup> T cells within total CD4<sup>+</sup> T cells, gated on B220<sup>-</sup>, CD8<sup>-</sup>, PI<sup>-</sup> and CD4<sup>+</sup> cells.

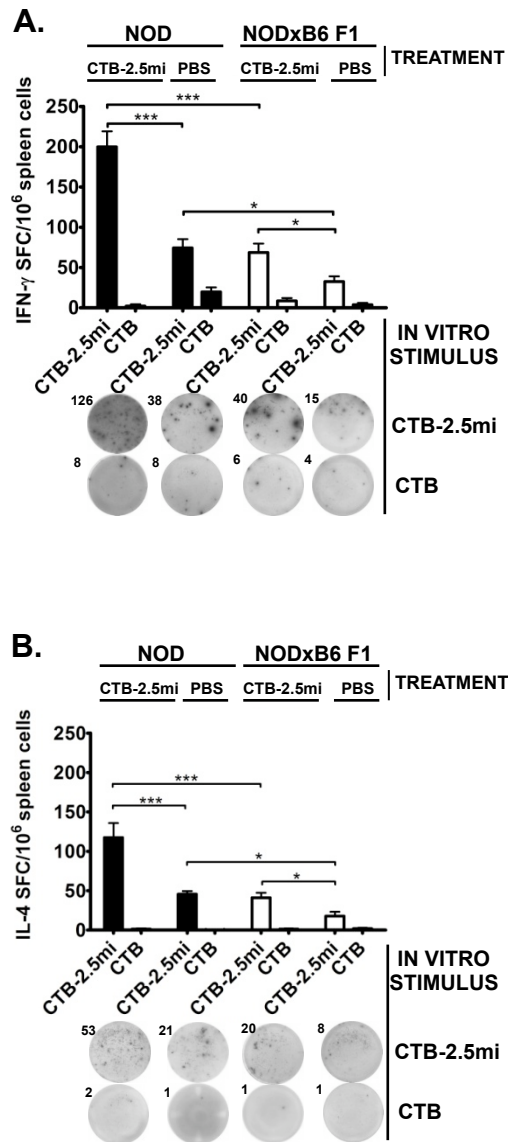

**Supplemental Figure S2** Representative examples of the ELISPOTS of Fig. 6 B and C are shown (Th1 and Th2 cytokine analysis in NOD.Foxp3<sup>EGFP</sup> and NODxB6.Foxp3<sup>EGFP</sup> F1 mice.). Five to 6 week old NOD.Foxp3<sup>EGFP</sup> and NODxB6.Foxp3<sup>EGFP</sup> F1 females were treated with 5 doses of 200  $\mu$ g CTB-2.5mi or PBS every 3 to 4 days i.g. Four days after the last dose, T cells were analyzed for cytokine production.

Total splenocytes from treated mice were incubated with 100 ng/ml of CTB-2.5mi or CTB and cytokine secretion quantified 2 days later (A, IFN- $\gamma$ ; B, IL-4). Values indicate spot forming cells (SFC) per 10<sup>6</sup> splenocytes; mean values  $\pm$  SEM are indicated after subtraction of SFC in unstimulated wells. n=6 and 12, resulting from 2 and 4 independent experiments for NOD.Foxp3<sup>EGFP</sup> and NODxB6.Foxp3<sup>EGFP</sup> F1 mice, respectively (\*p<0.05, \*\*p<0.01, \*\*\*p<0.0001).

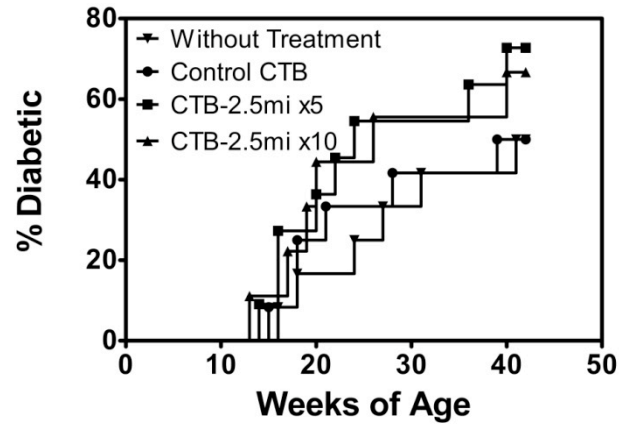

**Supplemental Figure S3** Oral treatment with CTB-2.5mi does not prevent T1D development in NOD mice.

Five-week-old NOD females (n=10/treatment group) were treated with 5 or 10 doses of 200  $\mu$ g each with either CTB (5 doses only), CTB-2.5mi every 3 to 4 days i.g. or left untreated and diabetes was onset monitored by weekly blood glucose measurements. Animals exceeding 200 mg/dl of blood glucose were considered diabetic. Curve differences are not statistically significant, Log-rank (Mantel-Cox) Test p = 0.5410.
